# Supplementary material for: Sustainable synthesis of metal compound/carbon composites via coordination chemistry for high-performance lithium-ion batteries
Source: Royal Society of Chemistry journal article supplement (doi:10.1039/d4ta03421j), 2024-01-01
Supplement: d4ta03421j1.pdf [file d4ta03421j1.pdf]

## Supporting Information

### Sustainable synthesis of metal compound/carbon composites via coordination chemistry for high-performance lithium-ion batteries

Weicai Zhang<sup>a,b†</sup>, Xiaomin Lin<sup>a†</sup>, Yawei Fang<sup>a</sup>, Chaowei Yang<sup>a</sup>, Mingtao Zheng<sup>a,c</sup> and Yeru Liang<sup>a,c\*</sup>

<sup>a</sup>Key Laboratory for Biobased Materials and Energy of Ministry of Education, College of Materials and Energy, South China Agricultural University, Guangzhou 510642, P. R. China

<sup>b</sup>Songshan Lake Materials Laboratory (SLAB), Dongguan 523808, P. R. China

<sup>c</sup>Maoming Branch, Guangdong Laboratory of Lingnan Modern Agriculture, Maoming

<sup>†</sup>Equal contribution

\*Corresponding author: E-mail: liangyr@scau.edu.cn

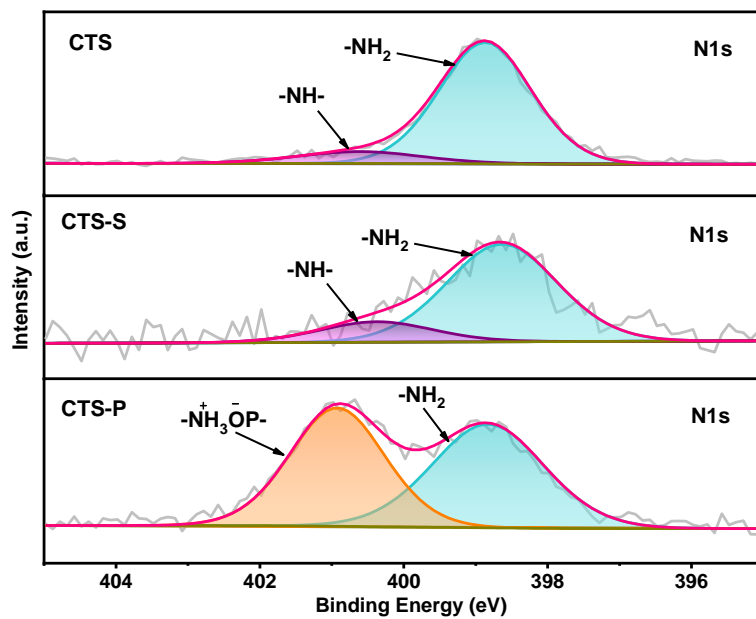

Fig. S1 N 1s spectra of CTS, CTS-S and CTS-P.

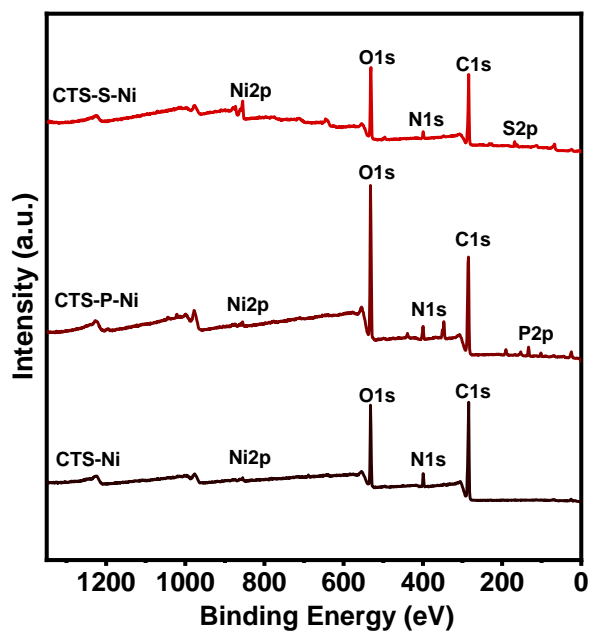

Fig. S2 XPS spectra of CTS-Ni, CTS-P-Ni and CTS-S-Ni.

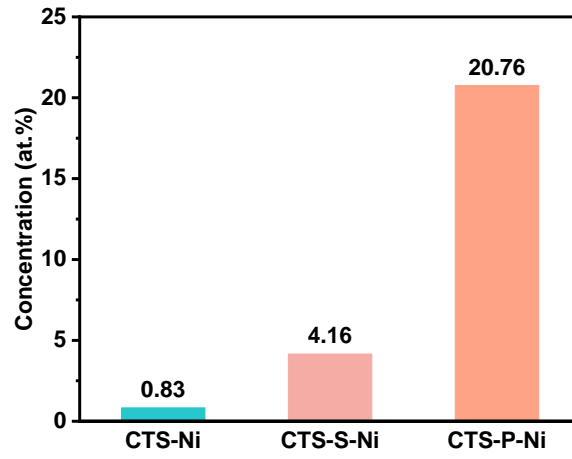

**Fig. S3** Concentration of Ni in CTS-Ni, CTS-S-Ni and CTS-P-Ni.

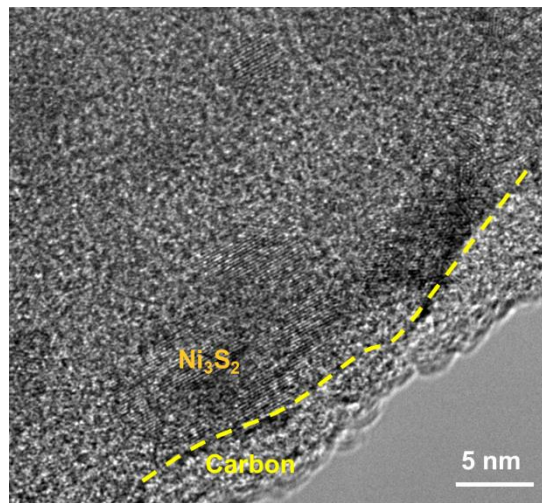

**Fig. S4** HRTEM image of  $\text{Ni}_3\text{S}_2/\text{C}$ .

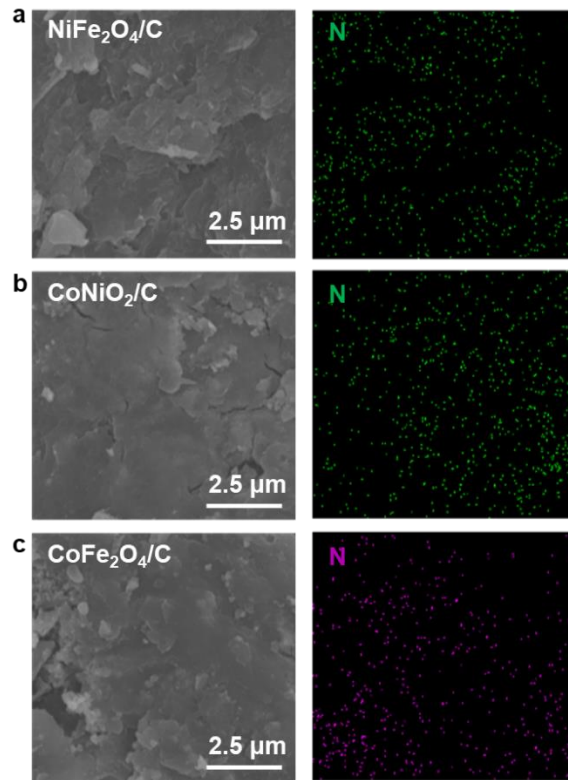

**Fig. S5** SEM images and EDS images of  $\text{NiFe}_2\text{O}_4/\text{C}$ ,  $\text{CoNiO}_2/\text{C}$  and  $\text{CoFe}_2\text{O}_4/\text{C}$ .

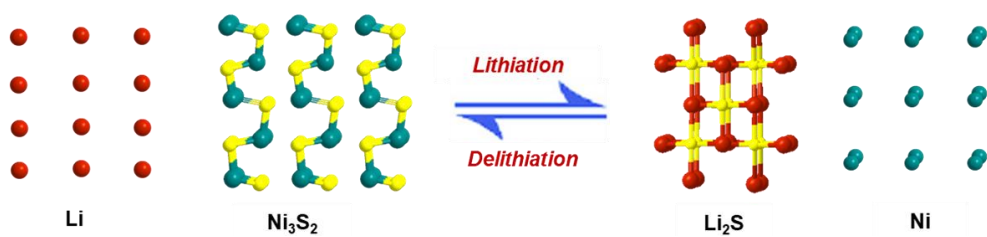

**Fig. S6** Schematic illustration of lithium storage mechanism in  $\text{Ni}_3\text{S}_2/\text{C}$  anode.

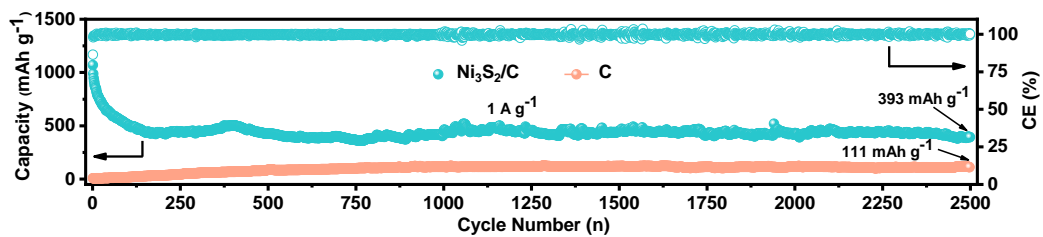

**Fig. S7** Cycling performances of Ni<sub>3</sub>S<sub>2</sub>/C and C anodes at the current density of 1.0 A

g<sup>-1</sup>.

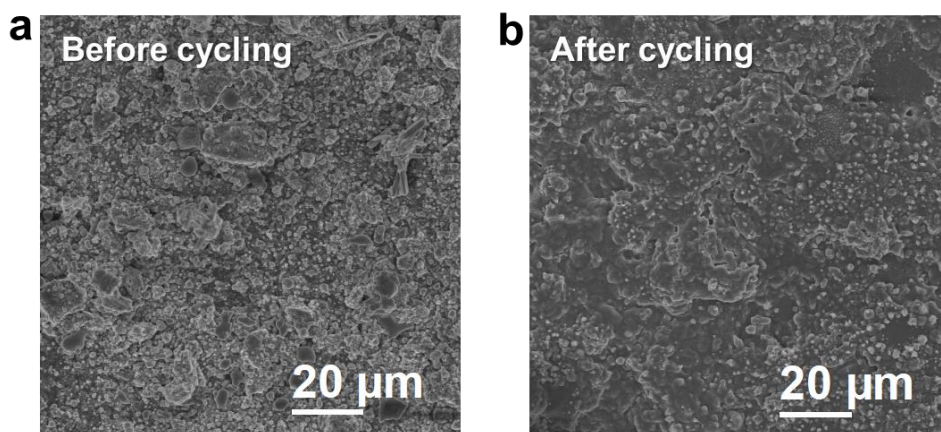

**Fig. S8** SEM images of Ni<sub>3</sub>S<sub>2</sub>/C anode before and after cycling.

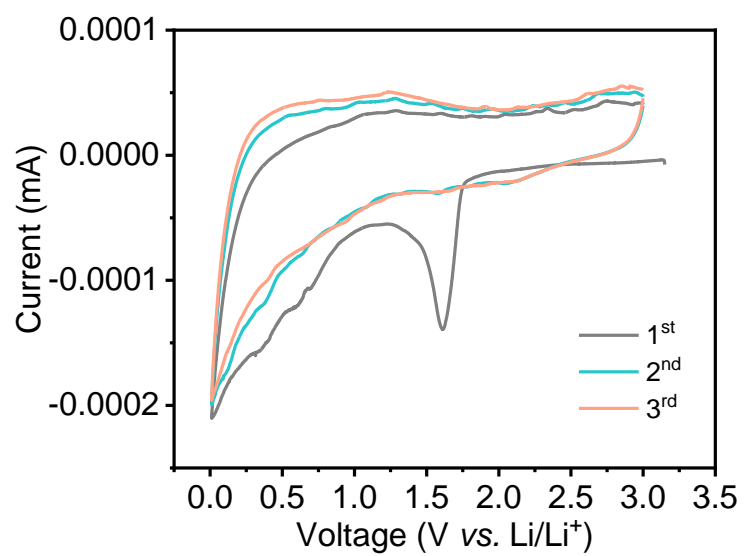

**Fig. S9** CV curves of Ni<sub>12</sub>P<sub>5</sub>/C anodes at 0.2 mV s<sup>-1</sup>.

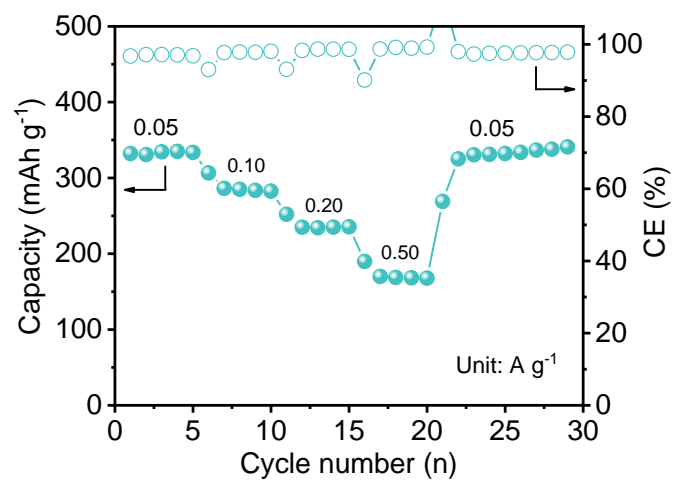

**Fig. S10** Rate performance of Ni<sub>12</sub>P<sub>5</sub>/C anode.

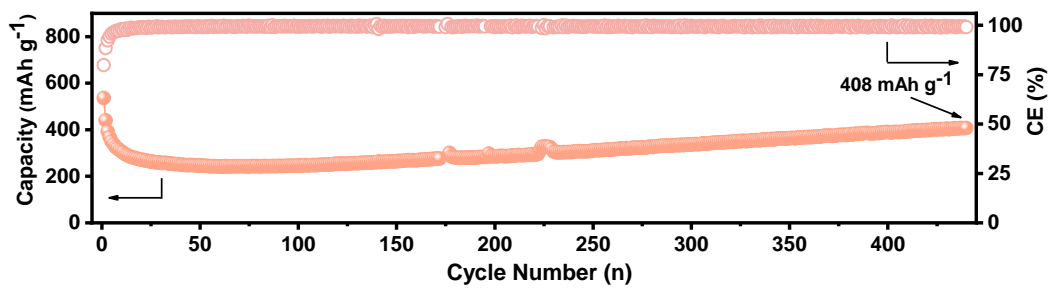

**Fig. S11** Cycling performance of ZnS/C anode at the current density of 0.05 A g<sup>-1</sup>.

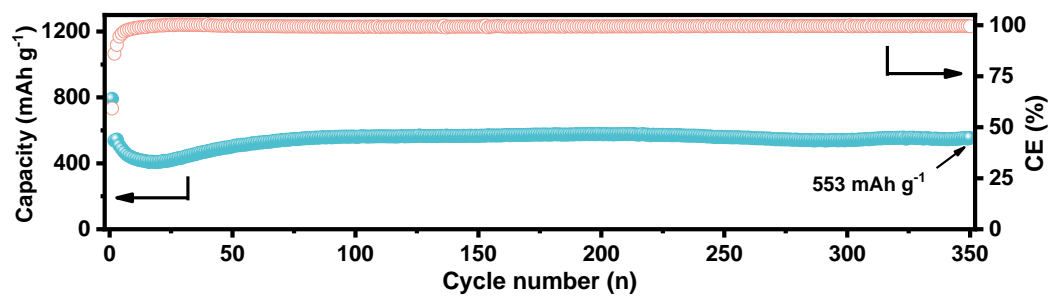

**Fig. S12** Cycling performance of NiFe<sub>2</sub>O<sub>4</sub>/C anode at the current density of 0.10 A g<sup>-1</sup>.

**Table S1.** Comparisons of the cycling performance of Ni<sub>x</sub>S<sub>y</sub>-based anodes for LIBs.

| Anodes                               | Current density<br>(A g <sup>-1</sup> ) | Cycle<br>number | Discharge capacity<br>(mAh g <sup>-1</sup> ) | Ref.                 |
|--------------------------------------|-----------------------------------------|-----------------|----------------------------------------------|----------------------|
| NiS-GNS                              | 0.1                                     | 60              | 887                                          | [1]                  |
| NiS@OLC                              | 0.1                                     | 100             | 546                                          | [2]                  |
| C <sup>o</sup> NiS-L                 | 60                                      | 100             | 300                                          | [3]                  |
| NiS/N-rGO                            | 0.5                                     | 100             | 467                                          | [4]                  |
| CSF-NiS/C                            | 0.1                                     | 100             | 411.6                                        | [5]                  |
| NiS/G                                | 50                                      | 400             | 481                                          | [6]                  |
| NiS <sub>x</sub> /rGO-500            | 0.1                                     | 60              | 1026.0                                       | [7]                  |
| NiS@SiO <sub>2</sub> /graphene       | 0.1                                     | 100             | 750                                          | [8]                  |
| HBC-NiS/C                            | 0.2                                     | 100             | 652                                          | [9]                  |
| NiS@NSC                              | 0.1                                     | 200             | 715.9                                        | [10]                 |
| <b>Ni<sub>3</sub>S<sub>2</sub>/C</b> | <b>0.05</b>                             | <b>250</b>      | <b>1434</b>                                  | <b>This<br/>work</b> |



**Table S2.** Comparisons of the rate performance of Ni<sub>x</sub>S<sub>y</sub>-based anodes for LIBs.

| Anodes                              | Rate capability/mAh g <sup>-1</sup> (Numbers in parentheses denote current density in mA g <sup>-1</sup> )         | Ref.             |
|-------------------------------------|--------------------------------------------------------------------------------------------------------------------|------------------|
| NiS@SiO <sub>2</sub> /graphene      | 680 (20), 640 (30), 610 (50), 570 (80),<br>540 (1200), 500 (1600)                                                  | [8]              |
| GeS <sub>2</sub> @NiS@N-C           | 1166.2 (100), 1059.5 (200), 905.8 (500), 841.2<br>(800), 817.4 (1000), 724.8 (2000), 641.7<br>(5000), 593.2 (8000) | [11]             |
| HBC-NiS/C                           | 621 (200), 519 (500), 358 (1000), 170 (2000),<br>108 (3000)                                                        | [9]              |
| NiS@NSC                             | 601.2 (100), 530.4 (200), 491.5 (500),<br>479.1(1000),446.1(2000)                                                  | [10]             |
| rGO@NiS                             | 1025.7 (100), 933.6 (200), 835.8 (500), 752.1<br>(1000), 673.6 (2000), 538.1(5000)                                 | [12]             |
| NiS/C                               | 827.8 (100), 715.0 (200), 551.8 (500), 455.6<br>(800), 384.5 (1000)                                                | [13]             |
| NiS <sub>p</sub> CW <sub>c</sub> GN | 625 (200),542 (500), 519 (800), 506 (1000),<br>476 (2000), 430(5000),374(10000)                                    | [14]             |
| NiS-GNS-CNT                         | 935 (250),752 (500), 650 (1000), 565 (2000),<br>440 (4000), 330(8000)                                              | [15]             |
| Ni <sub>3</sub> S <sub>2</sub> /C   | <b>1370 (50), 1117 (100), 1035 (200), 891 (500),<br/>787 (750), 717 (1000), 565 (2000)</b>                         | <b>This work</b> |

**Table S3.** Comparisons of the lithium-ion diffusion rate of MC/Cs anode in LIBs.

| Anodes                                            | $D_{Li}$ (cm <sup>2</sup> s <sup>-1</sup> )                                                             | Methods     | Ref.             |
|---------------------------------------------------|---------------------------------------------------------------------------------------------------------|-------------|------------------|
| NiS/C                                             | $1.3 \times 10^{-10}$                                                                                   | CV          | [13]             |
| FeP@C                                             | $1.04 \times 10^{-14}$                                                                                  | CV          | [16]             |
| Ni-FeP@C                                          | $2.53 \times 10^{-14}$                                                                                  | CV          |                  |
| MoS <sub>2</sub>                                  | $3.04 \times 10^{-14}$                                                                                  | EIS         | [17]             |
| Ni <sub>3</sub> S <sub>2</sub> -NCNFs             | $2.47 \times 10^{-7}$                                                                                   | CV          | [18]             |
| ZnSe/C                                            | $2.48 \times 10^{-12}$                                                                                  | EIS         | [19]             |
| CoSe@C                                            | $6.0 \times 10^{-11}$                                                                                   | EIS         | [20]             |
| SnSe/CoSe@C                                       | $3.6 \times 10^{-9}$                                                                                    | EIS         |                  |
| rGO/MnFe <sub>2</sub> O <sub>4</sub>              | $1.62 \times 10^{-6}$                                                                                   | CV          | [21]             |
| MnO <sub>2</sub> @PNC                             | $1.0 \times 10^{-8}$                                                                                    | GITT        | [22]             |
| Co <sub>2</sub> GeO <sub>4</sub>                  | $6.3 \times 10^{-8}$                                                                                    | CV          | [23]             |
| Co <sub>x</sub> O <sub>y</sub> @PC                | $6.6 \times 10^{-17}$                                                                                   | CV          | [24]             |
| O <sub>v</sub> -MnO/Ni OCNs                       | $8.43 \times 10^{-12}$                                                                                  | GITT        | [25]             |
| CFO@N-C                                           | $2.76 \times 10^{-13}$                                                                                  | EIS         | [26]             |
| O <sub>v</sub> -MnO/Co NCPs                       | $3.92 \times 10^{-12}$                                                                                  | EIS         | [27]             |
| Sb/Sb <sub>2</sub> O <sub>3</sub> -NC-450         | $9.5384 \times 10^{-7}$                                                                                 | CV          | [28]             |
| Co-MnO@C-CNTs                                     | $6.93 \times 10^{-14}$                                                                                  | GITT        | [29]             |
| MnO-CNTs@TiO <sub>2</sub> -C                      | $7.78 \times 10^{-10}$                                                                                  | EIS         | [30]             |
| Mn <sub>2</sub> Mo <sub>3</sub> O <sub>8</sub> @C | $8.20 \times 10^{-17}$                                                                                  | EIS         | [31]             |
| F-GeO <sub>2</sub> @C                             | $2.8 \sim 5.7 \times 10^{-11}$ (discharge)<br>$0.5 \sim 8.0 \times 10^{-11}$ (charge)                   | GITT        | [32]             |
| Ni <sub>3</sub> S <sub>2</sub> /C                 | <b><math>2.71 \times 10^{-9}</math> (discharge)</b><br><b><math>2.27 \times 10^{-9}</math> (charge)</b> | <b>GITT</b> | <b>This work</b> |

## References

- [1] H. Geng, S. F. Kong, Y. Wang, *J. Mater. Chem. A* **2014**, *2*, 15152.
- [2] D. Han, N. Xiao, B. Liu, G. Song, J. Ding, *Mater. Lett.* **2017**, *196*, 119.
- [3] Z. Wang, X. Li, Y. Yang, Y. Cui, H. Pan, Z. Wang, B. Chen, G. Qian, *J. Mater. Chem. A* **2014**, *2*, 7912.
- [4] Y. J. Lee, T. H. Ha, G. B. Cho, K. W. Kim, J. H. Ahn, K. K. Cho, *J. Nanosci. Nanotechnol.* **2020**, *20*, 6782.
- [5] G. Xia, X. Li, J. He, Y. Wang, Y. Gu, L. Liu, J. Huang, P. Dong, J. Duan, D. Wang, Y. Zhang, Y. Zhang, *Ceram. Int.* **2021**, *47*, 20948.
- [6] Q. Pan, J. Xie, S. Liu, G. Cao, T. Zhu, X. Zhao, *RSC Adv.* **2013**, *3*, 3899.
- [7] N. Tronganh, Y. Gao, W. Jiang, H. Tao, S. Wang, B. Zhao, Y. Jiang, Z. Chen, Z. Jiao, *Appl. Surf. Sci.* **2018**, *439*, 386.
- [8] Z. Zhang, H. Zhao, Z. Zeng, C. Gao, J. Wang, Q. Xia, *Electrochim. Acta.* **2015**, *155*, 85.
- [9] J. Huang, G. Xia, L. Cheng, L. Liu, Y. Zhang, J. Duan, Y. Zhang, D. Wang, *J. Electrochem. Soc.* **2022**, *169*, 090511.
- [10] X. Dong, Z. P. Deng, L. H. Huo, X. F. Zhang, S. Gao, *J. Alloy. Compd.* **2019**, *788*, 984.
- [11] L. Li, D. Wang, S. Pei, R. Cao, X. Guo, J. Liu, Z. Zhang, Z. Zhou, G. Li, *Appl. Surf. Sci.* **2022**, *605*, 154782.
- [12] H. Ren, J. Wang, Y. Cao, W. Luo, Y. Sun, *Mater. Res. Bull.* **2021**, *133*, 111047.
- [13] L. Wang, Z. Wang, L. Xie, L. Zhu, X. Cao, *Electrochim. Acta.* **2020**, *343*, 136138.
- [14] C. Wu, J. Maier, Y. Yu, *Adv. Mater.* **2016**, *28*, 174.
- [15] X. Wang, X. Liu, G. Wang, Y. Zhou, H. Wang, *J. Power Sources.* **2017**, *342*, 105.
- [16] Z. Yan, Z. Sun, K. Yue, A. Li, H. Liu, Z. Guo, L. Qian, *Appl. Surf. Sci.* **2021**, *554*.
- [17] L. H. Wang, L. L. Ren, Y. F. Qin, Q. Li, *Front. Chem.* **2022**, *9*, 812247.
- [18] M. Guan, Z. Li, J. Ouyang, G. Li, L. Chen, M. Zhou, B. He, W. Xu, W. Wang,

- Z. Hou, *Mater. Today Commun.* **2022**, *31*, 103652.
- [19] J. Yuan, X. Li, H. Li, W. Lai, Y. Gan, J. Yang, X. Zhang, J. Liu, X. Zhu, X. Li, *Chem.-Eur. J.* **2021**, *27*, 14989.
- [20] S. Lu, W. Luo, Z. Chao, Y. Liu, Z. Zhang, J. Fan, *Energy Fuels.* **2022**, *36*, 2260.
- [21] T. R. Madhura, P. Viswanathan, G. G. Kumar, R. Ramaraj, *J. Electroanal. Chem.* **2017**, *792*, 15.
- [22] X. Yuan, Z. Ma, S. Jian, H. Ma, Y. Lai, S. Deng, X. Tian, C. P. Wong, F. Xia, Y. Dong, *Nano Energy.* **2022**, *97*, 107235.
- [23] S. Yuvaraj, M. S. Park, V. G. Kumar, Y. S. Lee, D. W. Kim, *J. Electrochem. Sci. Technol.* **2017**, *8*, 323.
- [24] R. Tong, Y. Yan, X. Lu, Y. Li, Q. Tian, L. Yang, Z. Sui, J. Chen, *J. Alloy. Compd.* **2022**, *899*, 163293.
- [25] J. Lin, Y. Peng, R. C. K. Reddy, A. Zeb, X. Lin, Y. H. Sun, *Carbon Energy.* **2022**, *5*, e226.
- [26] D. Dong, W. Zhang, W. Gong, X. Yu, X. Zuo, C. Wu, *J. Alloy. Compd.* **2021**, *862*, 158044.
- [27] J. Lin, C. Zeng, X. Lin, C. Xu, X. Xu, Y. Luo, *ACS Nano.* **2021**, *15*, 4594.
- [28] Z. Wang, F. Zeng, D. Zhang, X. Wang, W. Yang, Y. Cheng, C. Li, L. Wang, *Electrochim. Acta.* **2021**, *395*, 139210.
- [29] Q. Sun, Z. Cao, J. Zhang, H. Cheng, J. Zhang, Q. Li, H. Ming, G. Liu, J. Ming, *Adv. Funct. Mater.* **2021**, *31*, 2009122.
- [30] Q. Li, Y. Wu, Z. Wang, H. Ming, W. Wang, D. Yin, L. Wang, H. N. Alshareef, J. Ming, *ACS Appl. Mater. Interfaces.* **2020**, *12*, 16276.
- [31] Q. Sun, L. Sun, H. Ming, L. Zhou, H. Xue, Y. Wu, L. Wang, J. Ming, *Nanoscale.* **2020**, *12*, 4366.
- [32] Y. Lin, K. Zhong, J. Zheng, M. Liang, G. Xu, Q. Feng, J. Li, Z. Huang, *ACS Appl. Energ. Mater.* **2021**, *4*, 9848.
